# Supplementary material for: (EDT-TTF-I2)2PbI3·H2O: an ambient pressure metal with a β′ donor slab topology
Source: Royal Society of Chemistry journal article supplement (doi:10.1039/b312493b), 2004-01-01

---

## (EDT-TTF-I<sub>2</sub>)<sub>2</sub>PbI<sub>3</sub>•H<sub>2</sub>O : an ambient pressure metal with a β' donor slab topology

---

Batail et al.

### [(C<sub>2</sub>H<sub>5</sub>)<sub>4</sub>N]PbI<sub>3</sub>

0.97 g (3.4 mmol) of [(C<sub>2</sub>H<sub>5</sub>)<sub>4</sub>N]I in 5 mL of aqueous hydriodic acid solution (57%) is added under stirring to a solution of 1.52 g of PbI<sub>2</sub> (3.3 mmol) in 6 mL of aqueous hydriodic acid solution (57%). A white precipitate appears and is dissolved by heating under reflux. Slow cooling down to 5°C affords pale yellow needles. After filtration, the crystals are washed with diethylether and dried under vacuum (2.14 g, 3.0 mmol, 90%), mp > 315°C. Anal Calcd for C<sub>8</sub>H<sub>20</sub>NI<sub>3</sub>Pb: C, 13.38; H, 2.81; N, 1.958. Found C, 13.15; H, 2.61; N, 1.93. EDX Calcd (normalised weight): I, 64.8; Pb, 35.2. Found: I, 65.7; Pb, 34.3.

Partial X-Ray structural elucidation confirms the face-sharing connection between the PbI<sub>6</sub> octahedra in the unidimensional polymeric anion [PbI<sub>3</sub><sup>-</sup>]. Crystal data. C<sub>24</sub>H<sub>60</sub>I<sub>9</sub>N<sub>3</sub>Pb<sub>3</sub>, *M* = 2154.42, hexagonal, *a* = 18.954(2), *c* = 8.1838(8) Å, *U* = 2546.2(5) Å<sup>3</sup>, *T* = 293(2) K, space group *P*6<sub>3</sub>/*m* (no. 176), *Z* = 2, μ(Mo-K<sub>α</sub>) = 15.4 mm<sup>-1</sup>, 3867 reflections measured, 1789 unique (*R*<sub>int</sub> = 0.1165) which were used in all calculations. The final *wR*(*F*<sup>2</sup>) was 0.1928 (all data).

X Ray powder diffraction pattern :

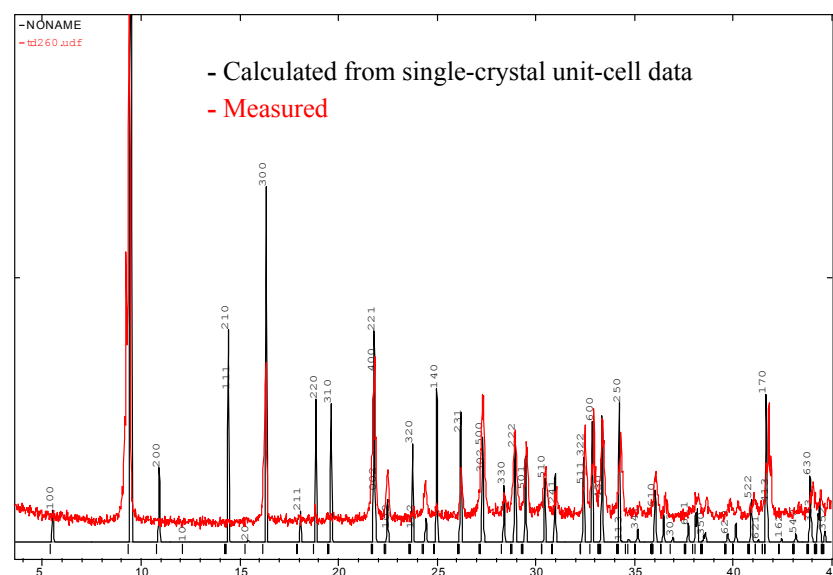

Supplement: b312493b.pdf [file b312493b.pdf]
